# Supplementary material
Source: Research Square preprint supplement (doi:10.21203/rs.3.rs-8999435/v1)
Supplement: Supplementary file 2 [file da314d2cfc917f6ebaa7f1b0.docx]

**Highlights**

- The in-situ polymerization technique was adopted for the synthesis of a hybrid composite of polyaniline-co-melamine/rGO/ZnO.
- The GCD studies reveal energy and power density of ~13.09 WhKg-1 and 0.25Wkg-1 respectively,at the current density of 1 Ag-1.
- High specific capacitance (Cs) of 525 Fg⁻¹ at 10mVs⁻¹ was obtained.
- The composite demonstrates remarkable capacitive retention of ~93.3% over 5000 cycles.
