# Supplementary material
Source: Research Square preprint supplement (doi:10.21203/rs.3.rs-8999435/v1)

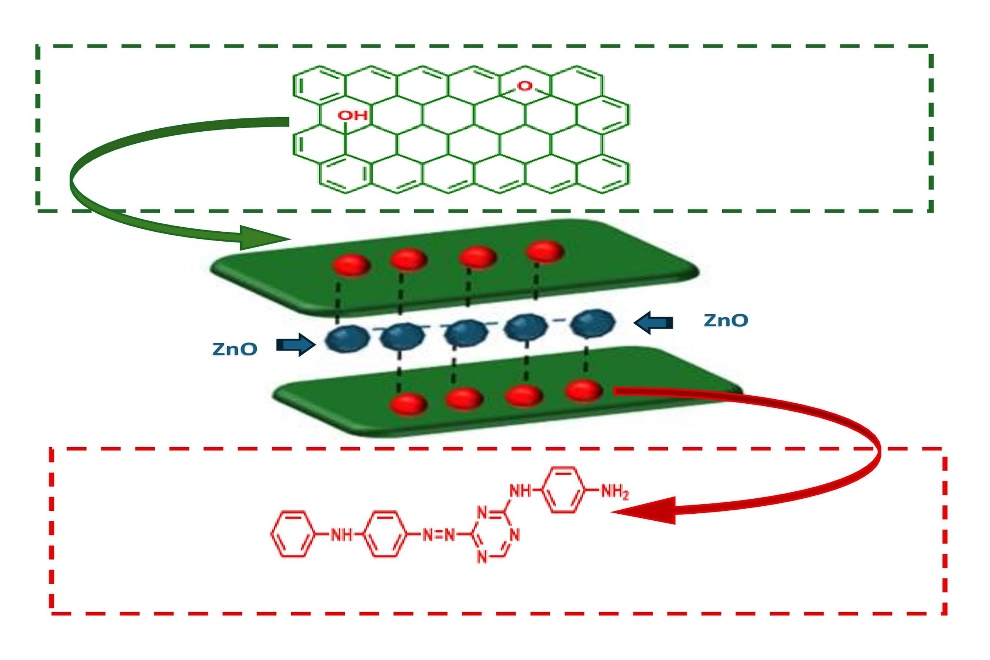

Supplement: Supplementary file 1 [file 9b9ee6c48bba57d53afccebc.docx]
